# Supplementary material for: Generalisable functional imaging classifiers of schizophrenia have multifunctionality as trait, state, and staging biomarkers
Source: bioRxiv or medRxiv preprint supplement (doi:10.1101/2024.01.02.23300101), 2024-05-06
Supplement: Supplementary file [file media-2.pdf]

**a**

Discovery dataset

10-fold CV

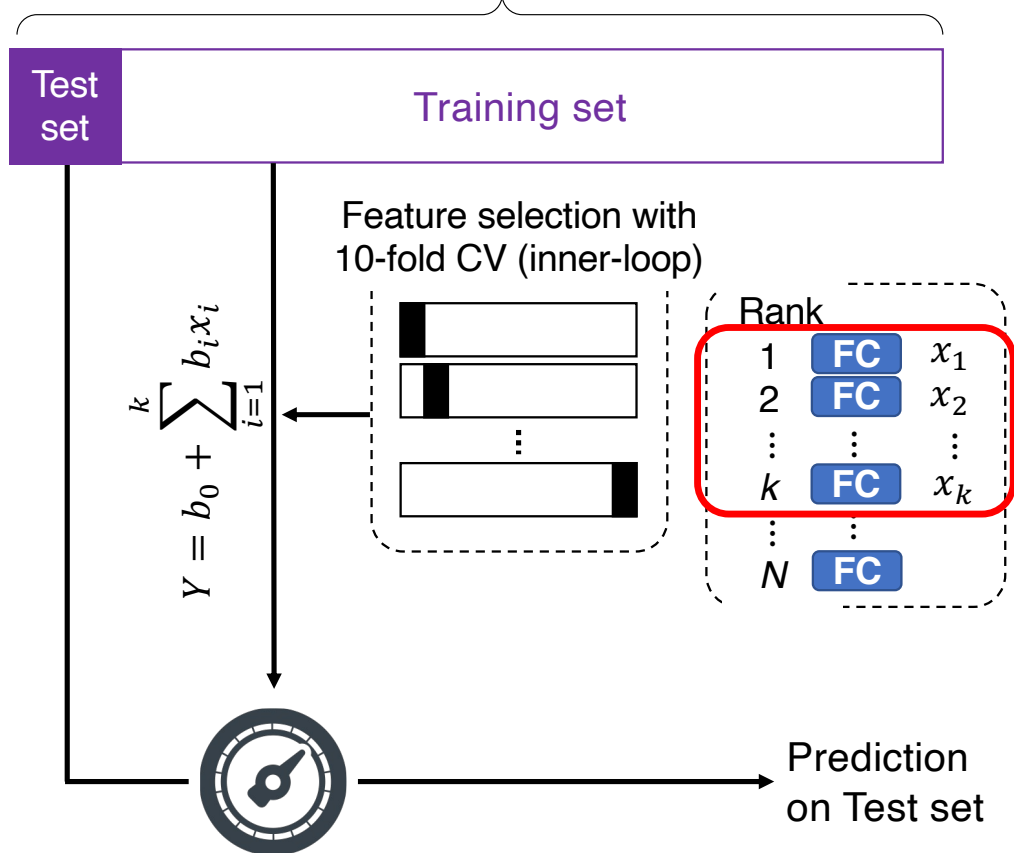**b**

1 FC

2 FCs

 $N$  FCs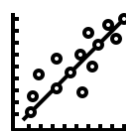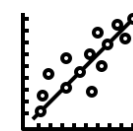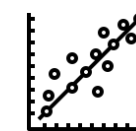

Select the best number of features

- Pareto front plot
- Identifying the knee point

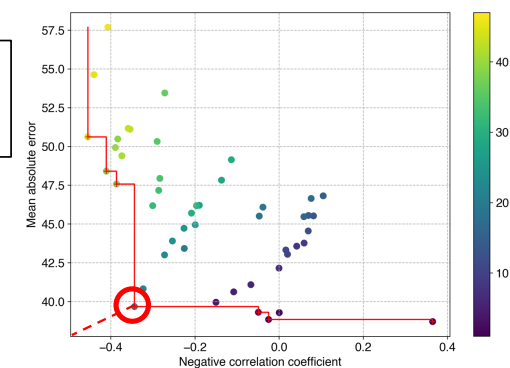**c**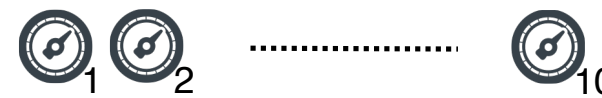

Prediction by each model

average

output

Validation dataset
