# Supplementary material for: Generalisable functional imaging classifiers of schizophrenia have multifunctionality as trait, state, and staging biomarkers
Source: bioRxiv or medRxiv preprint supplement (doi:10.1101/2024.01.02.23300101), 2024-05-06

# Results for Voting Classifiers

## Discovery dataset

**a**

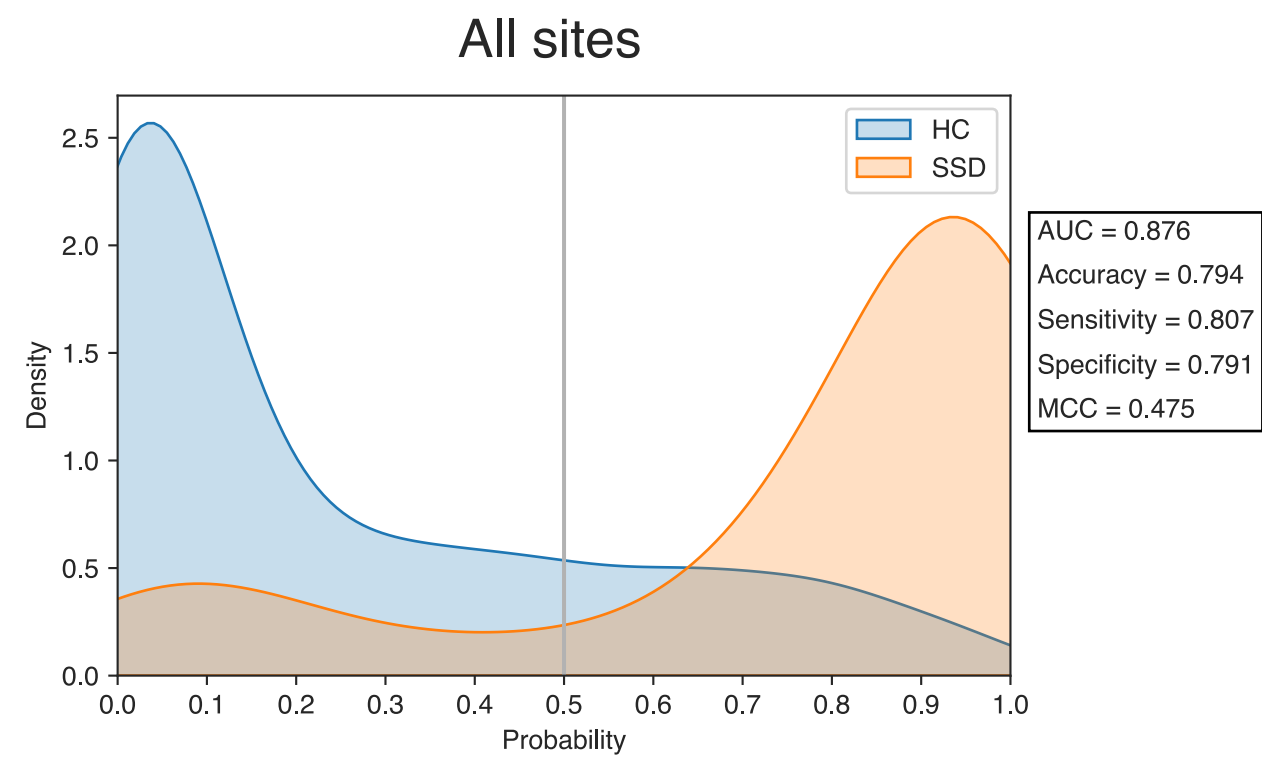

**b**

### Individual sites

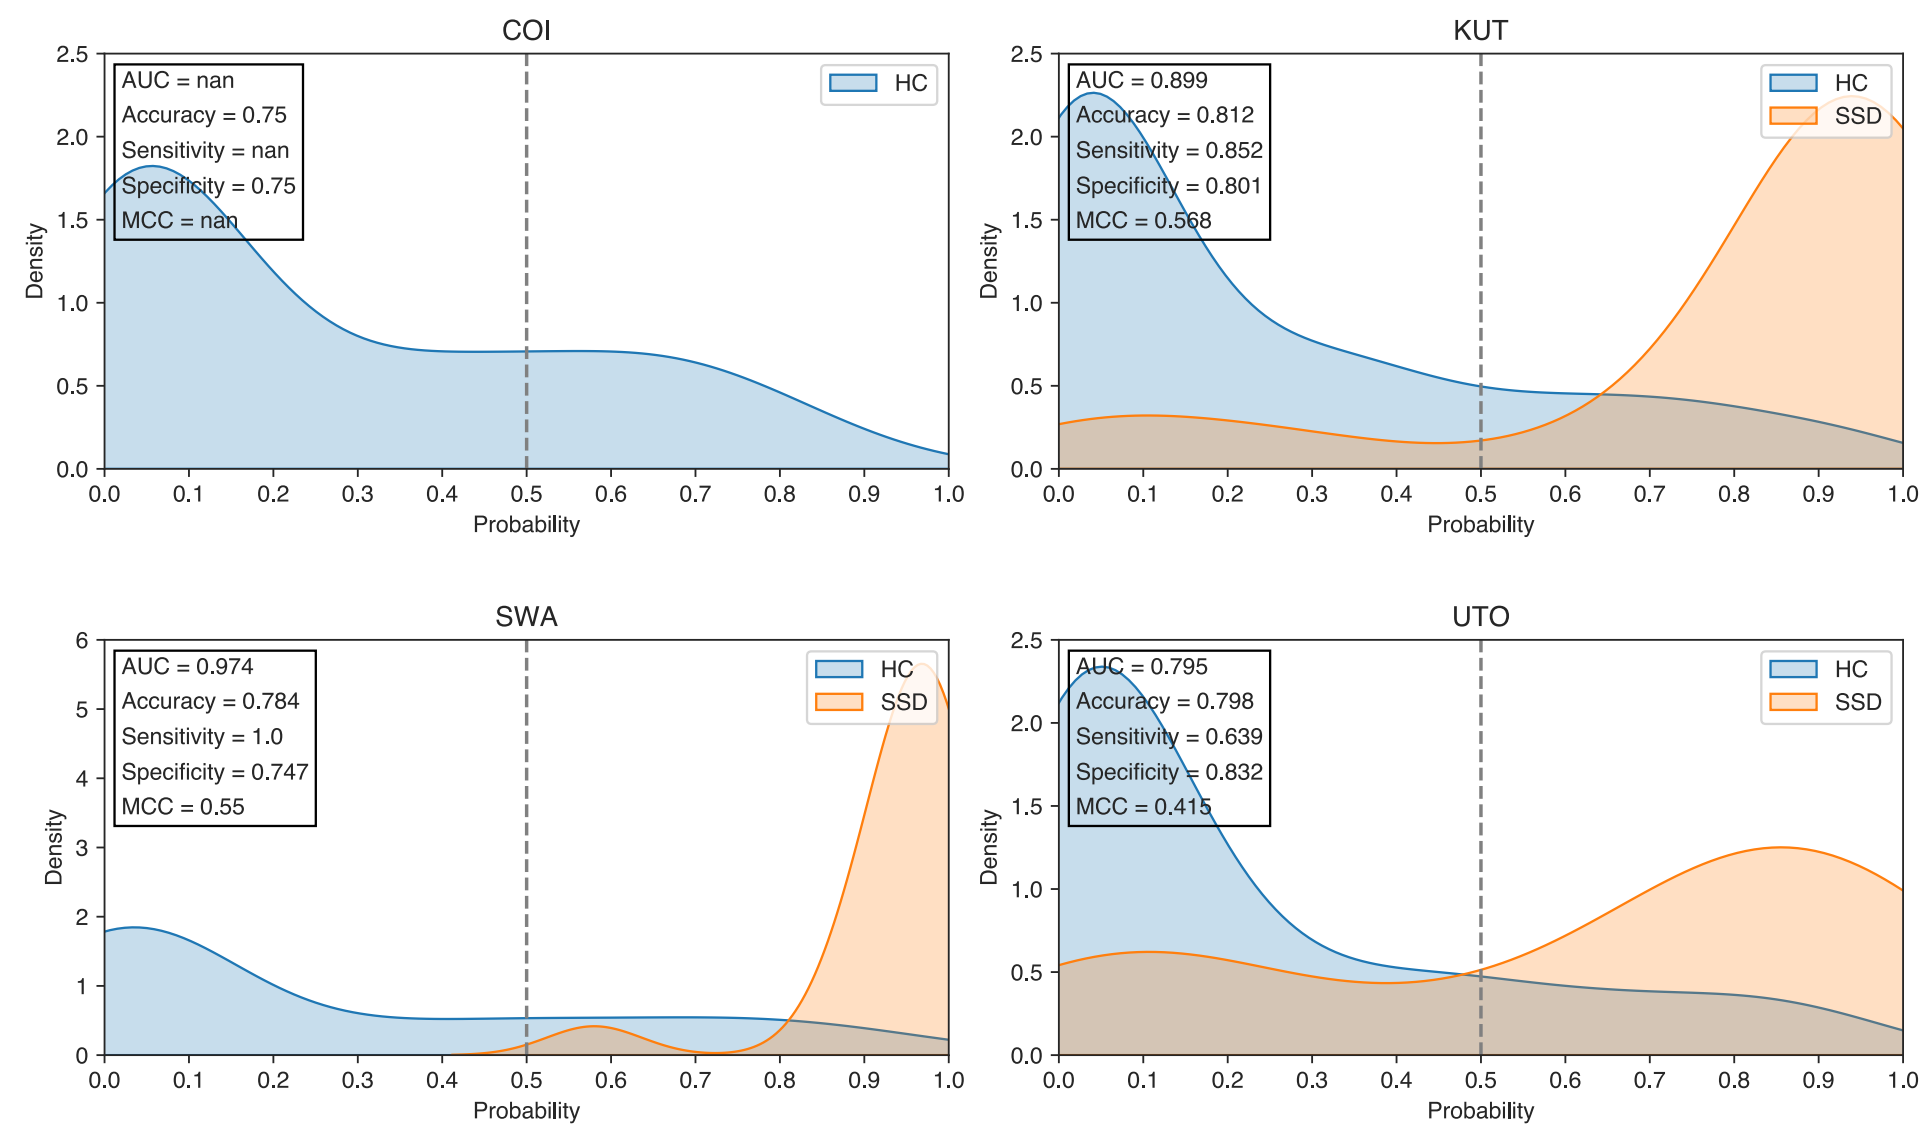

## Validation dataset

**c**

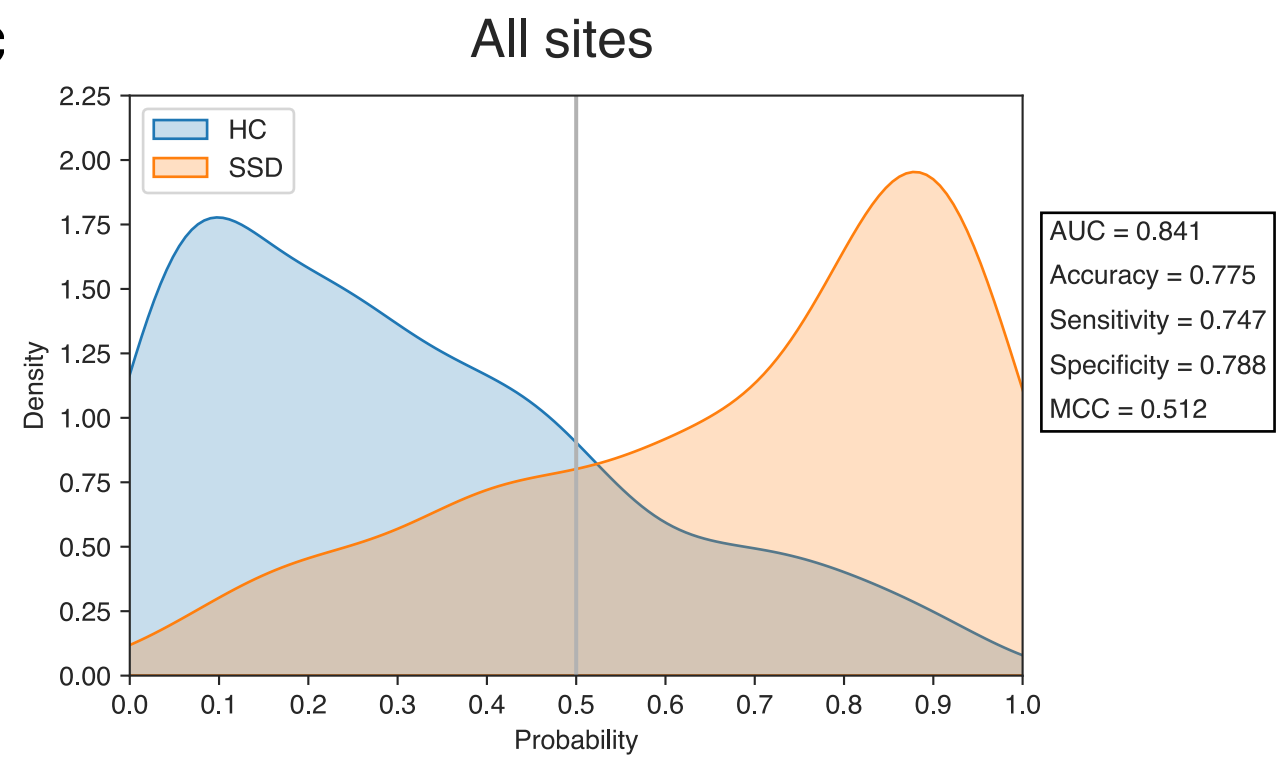

**d**

### Individual sites

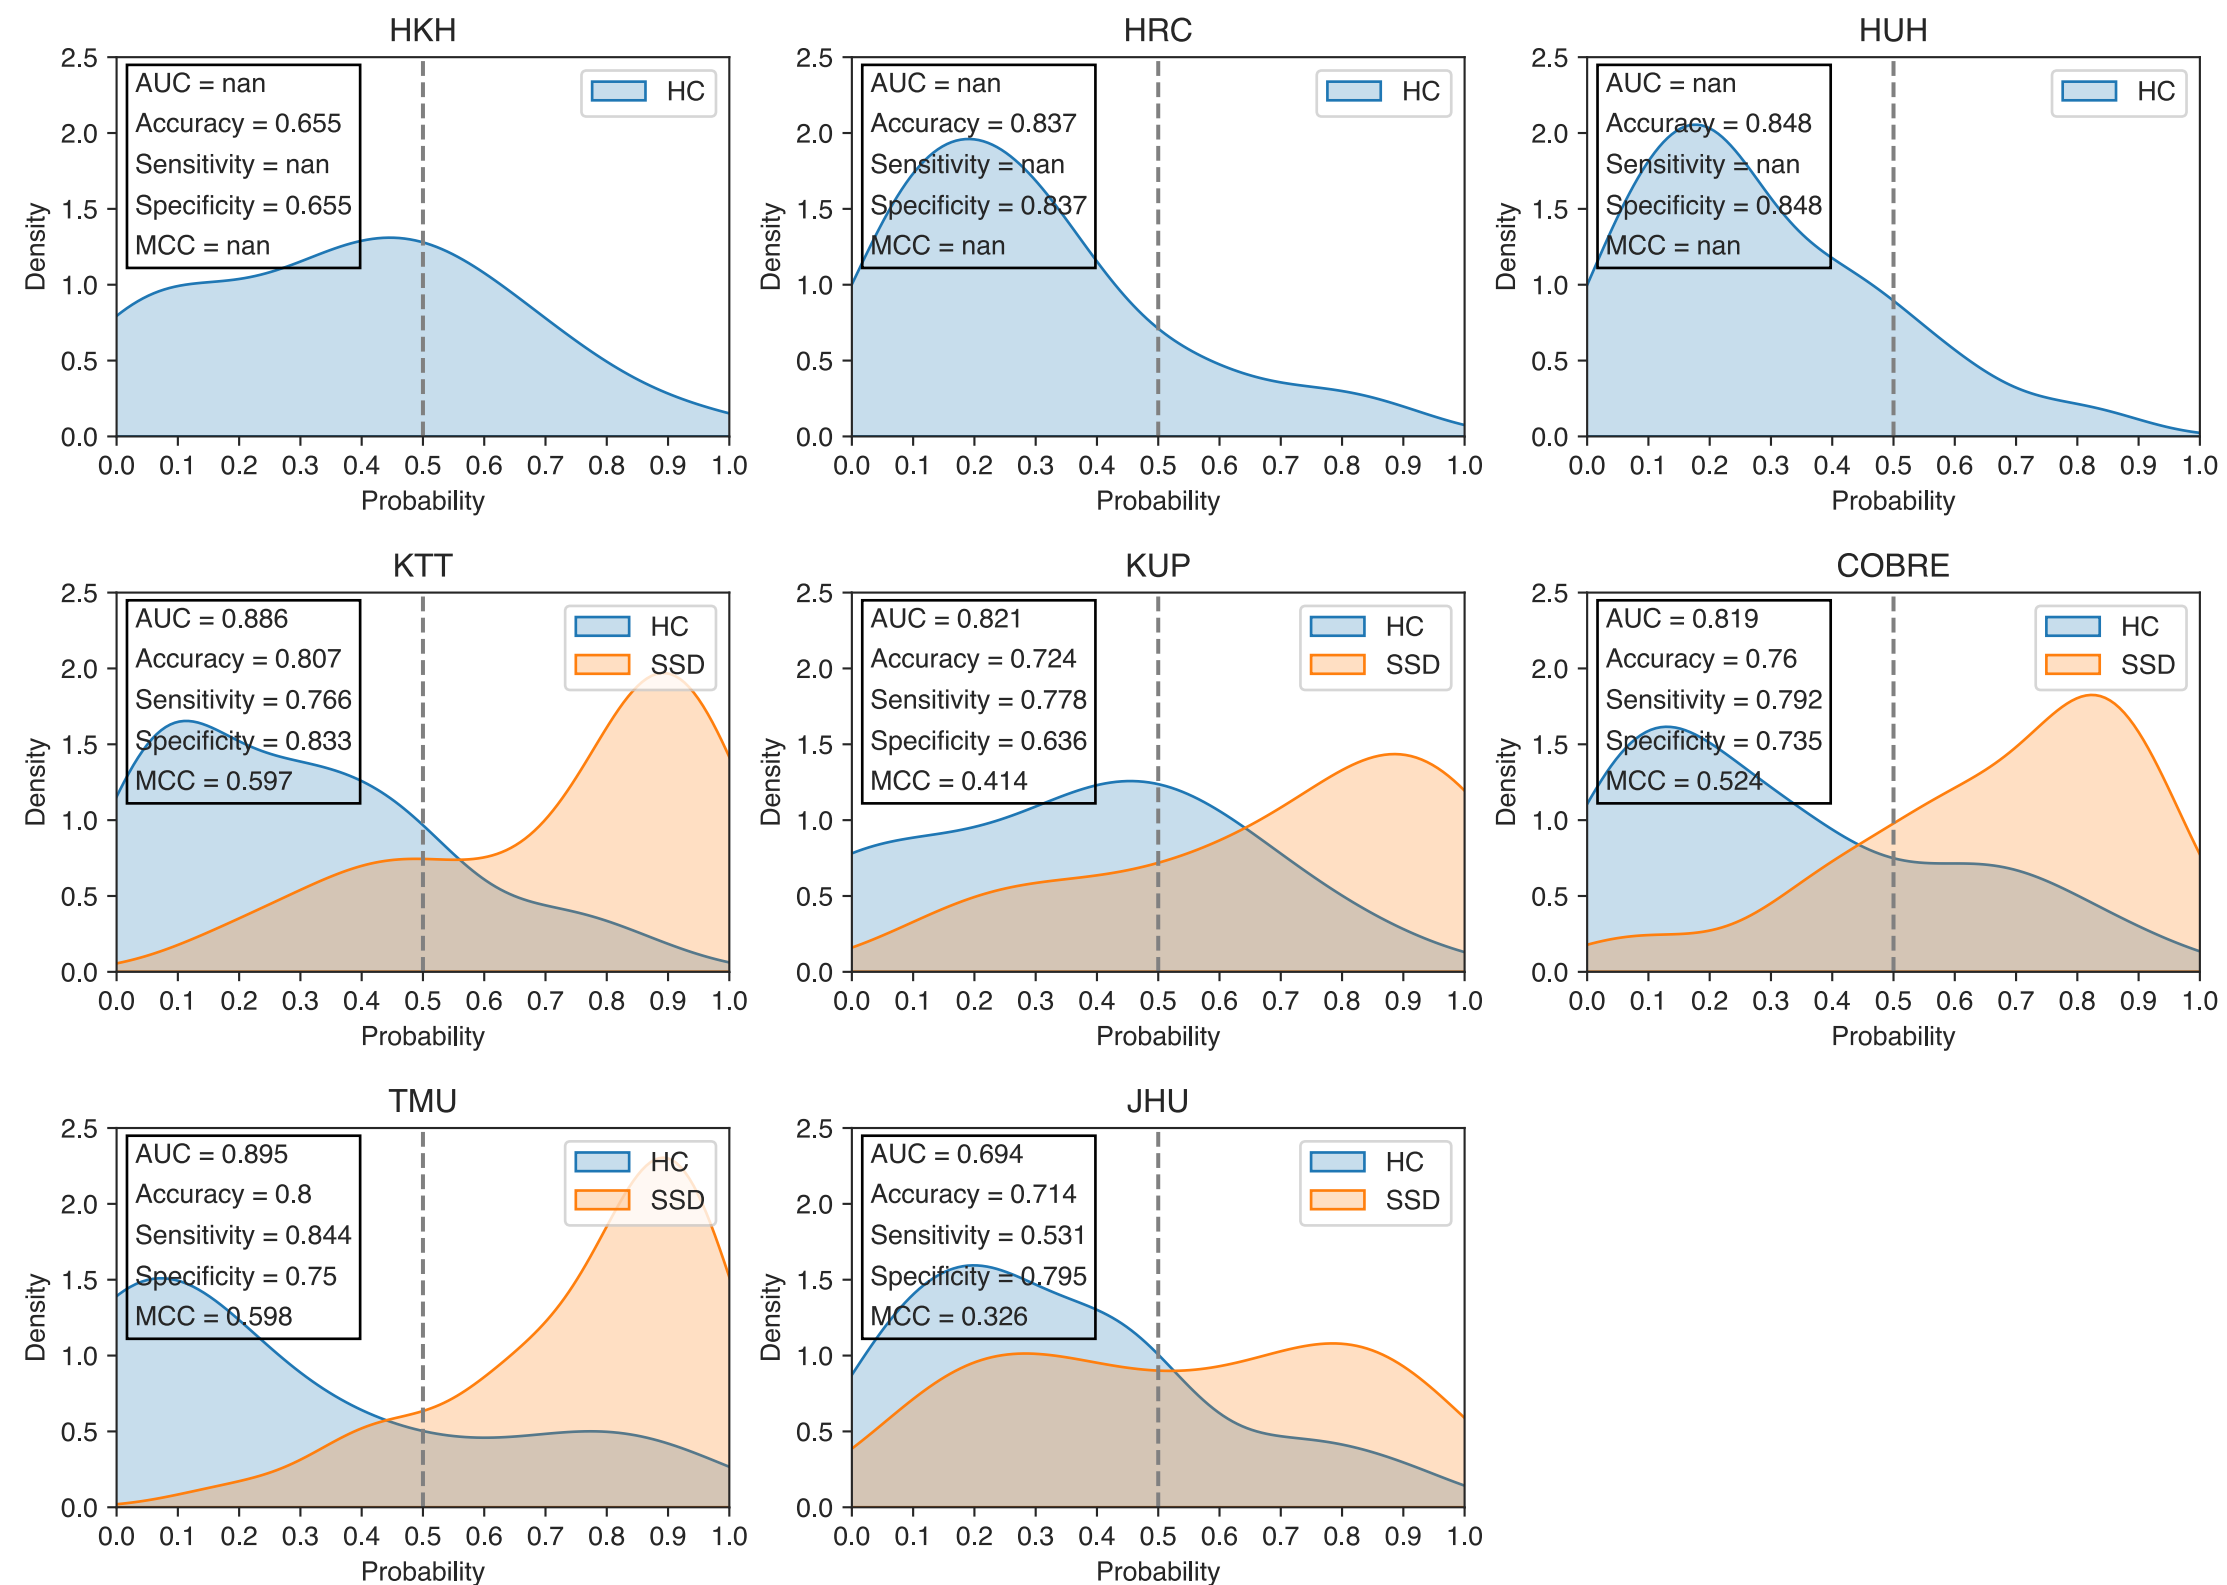

Supplement: Supplementary file [file media-3.pdf]
