# Supplementary material for: Generalisable functional imaging classifiers of schizophrenia have multifunctionality as trait, state, and staging biomarkers
Source: bioRxiv or medRxiv preprint supplement (doi:10.1101/2024.01.02.23300101), 2024-05-06

# a LASSO Classifiers

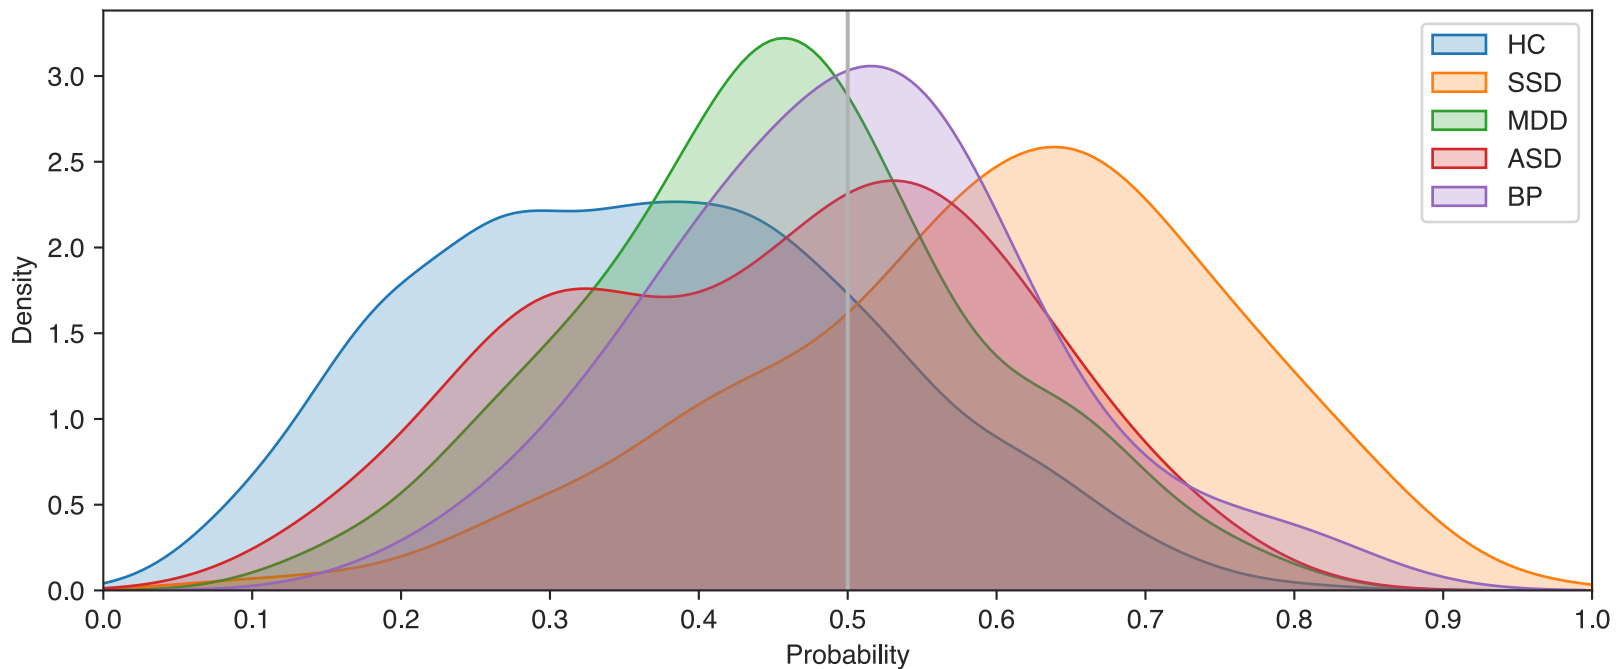

# b Voting Classifiers

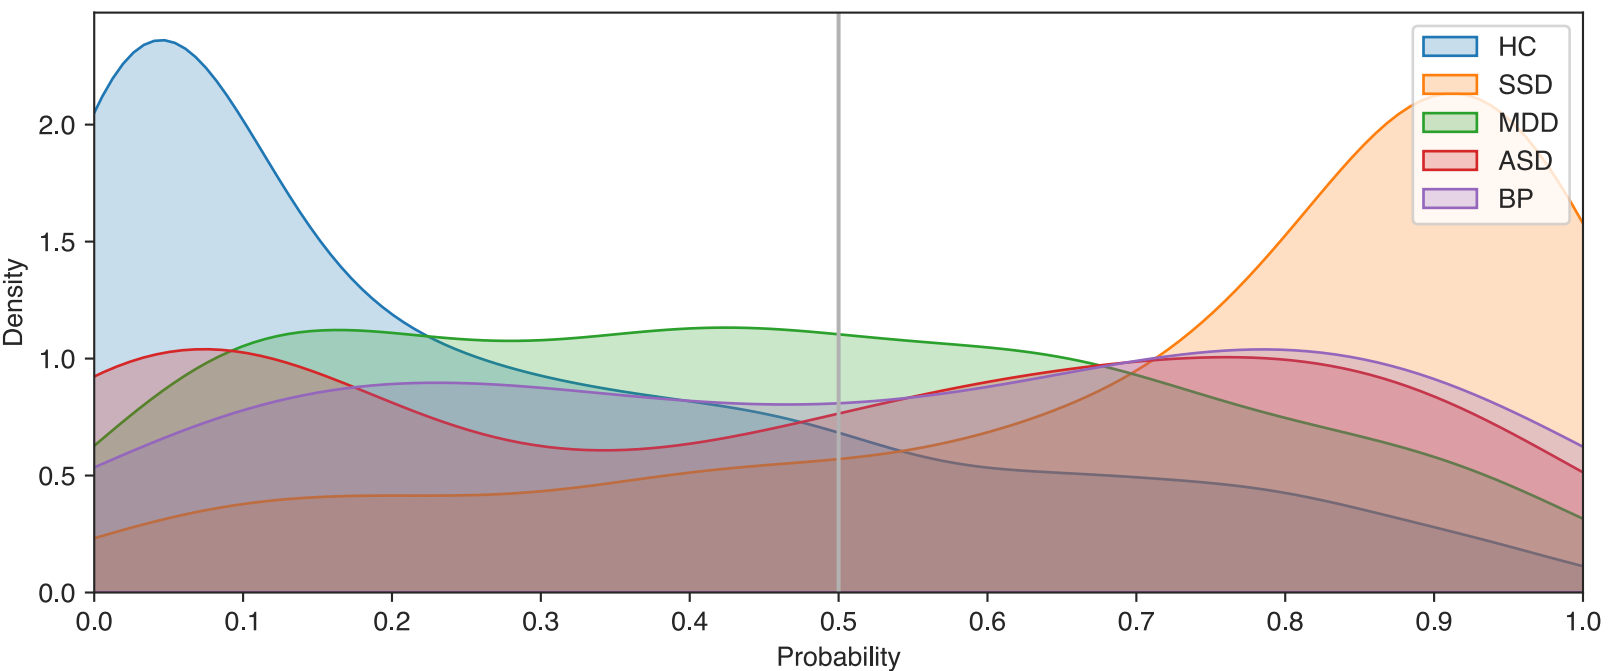

Supplement: Supplementary file [file media-4.pdf]
